# Supplementary material
Source: PubMed Central journal article supplement (PMC4563726)
Supplement: supp_O114.047555_mcp.O114.047555-5.pdf [file supp_O114.047555_mcp.O114.047555-5.pdf]

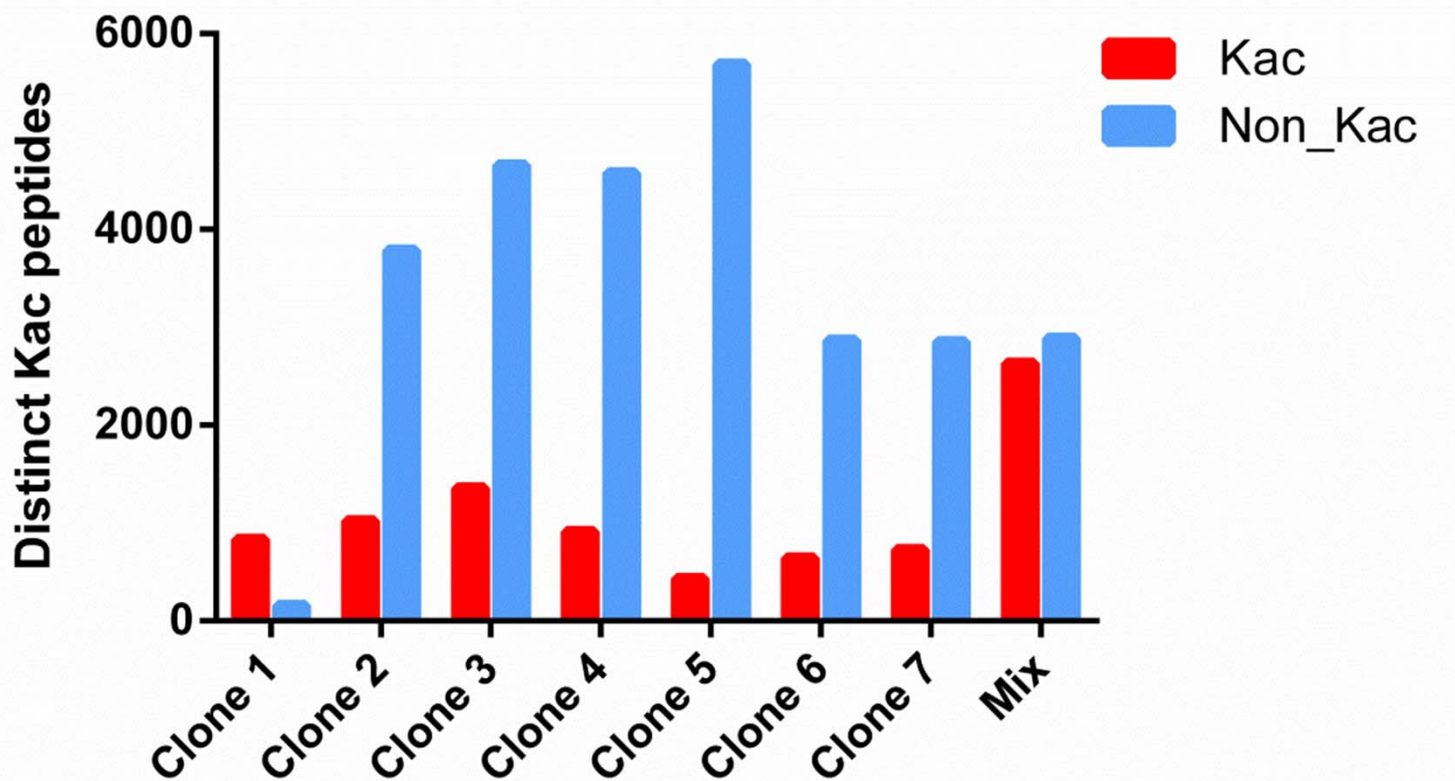

**Supplemental Figure 1:** Number of distinct Kac and Non-Kac peptides enriched with either individual anti-Kac antibody clones or a mix of all clones (CST).

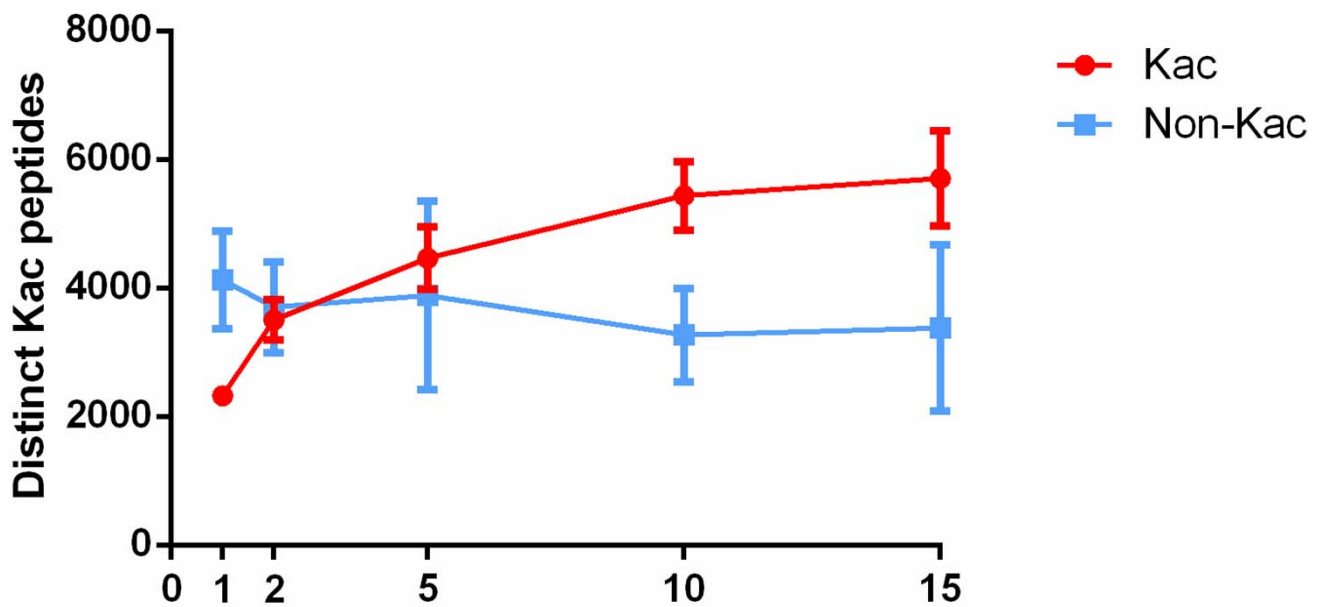

**Supplemental Figure 2:** Titration curve data for K-ac and non-K-ac peptides identified after enrichment of indicated peptide input using 50 ug of anti-Kac antibody (CST). Each data point is the average of 3 IP process replicates and error bars represent standard deviation.

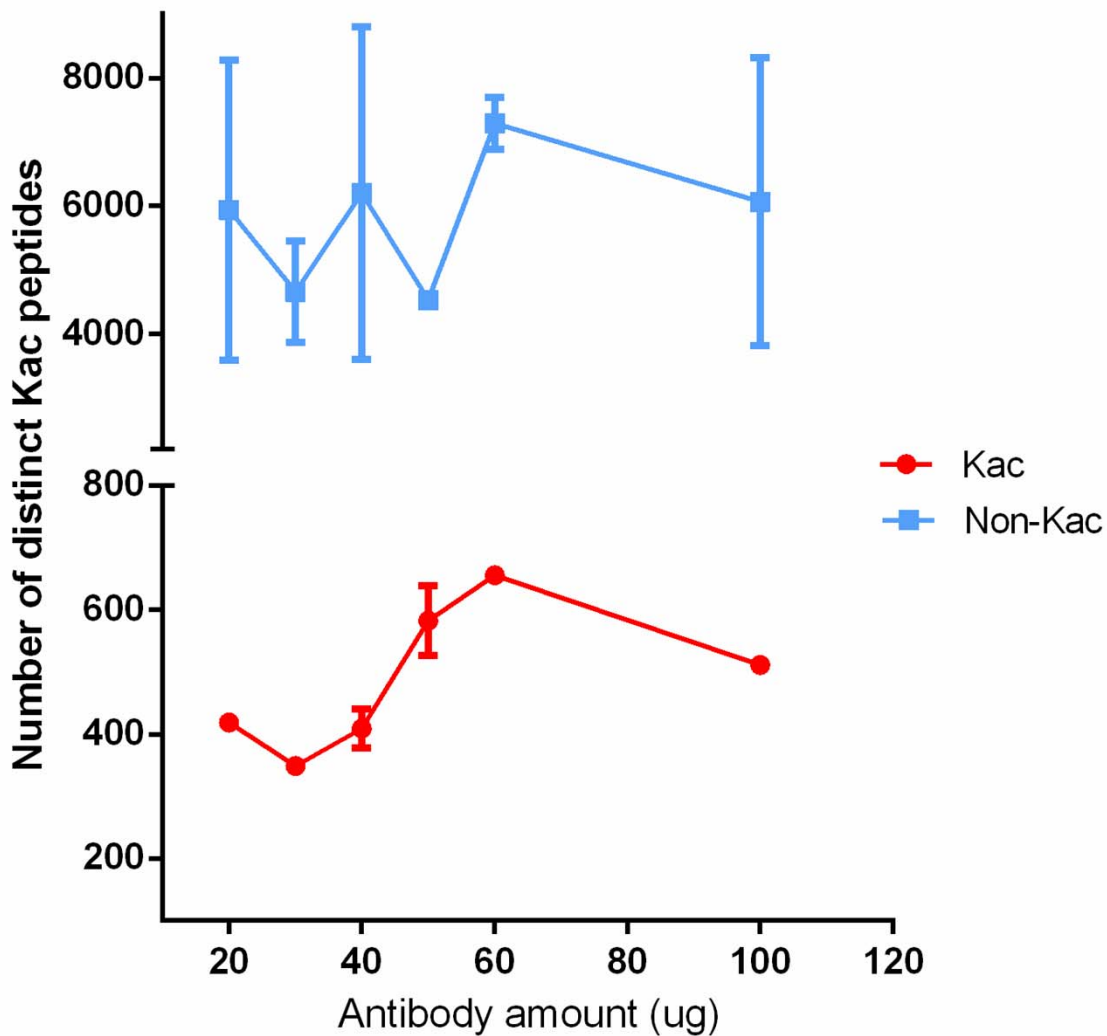

**Supplemental Figure 3:** Titration curve data for K-ac and non-K-ac peptides identified after enrichment of 1 mg of peptide input using indicated amounts of anti-Kac antibody (IMC). Each data point is the average of 2 IP process replicates and error bars represent range.

A

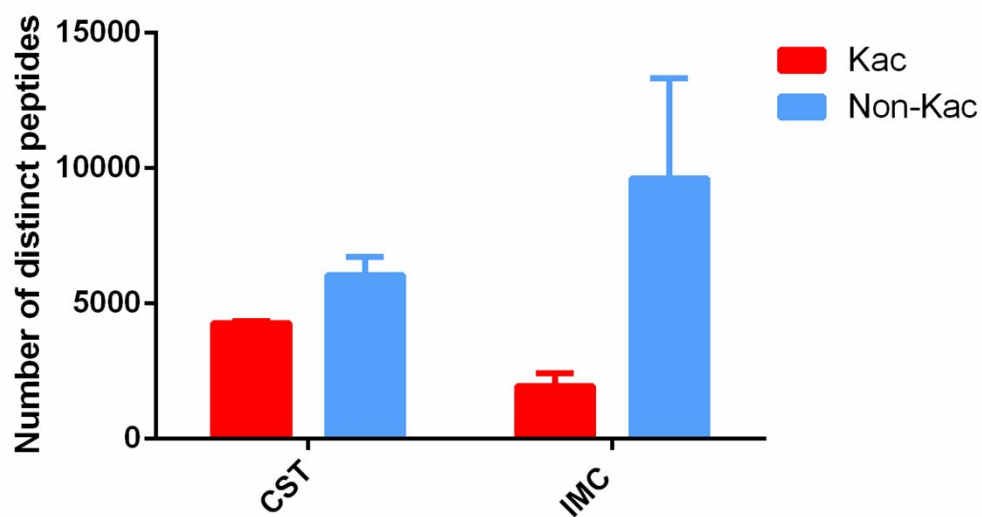

B

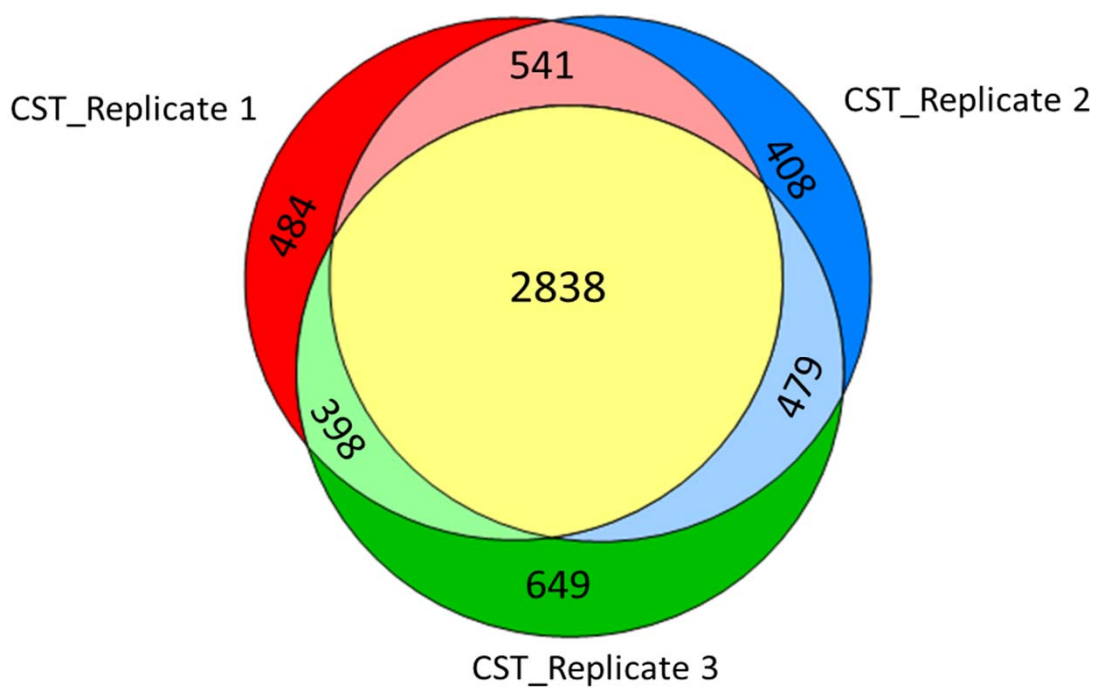

C

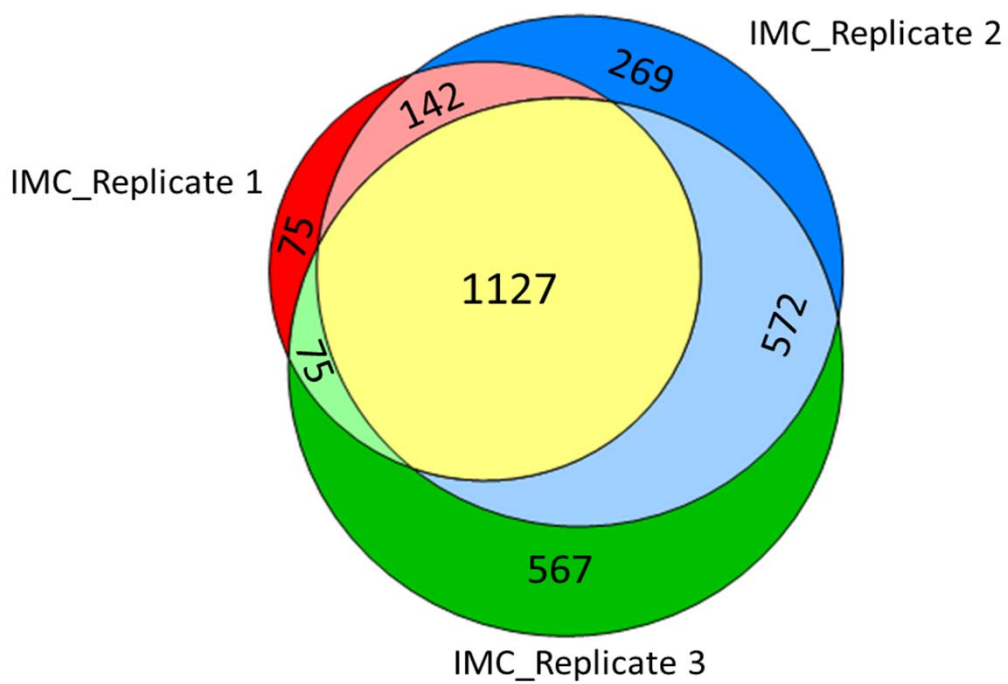

D

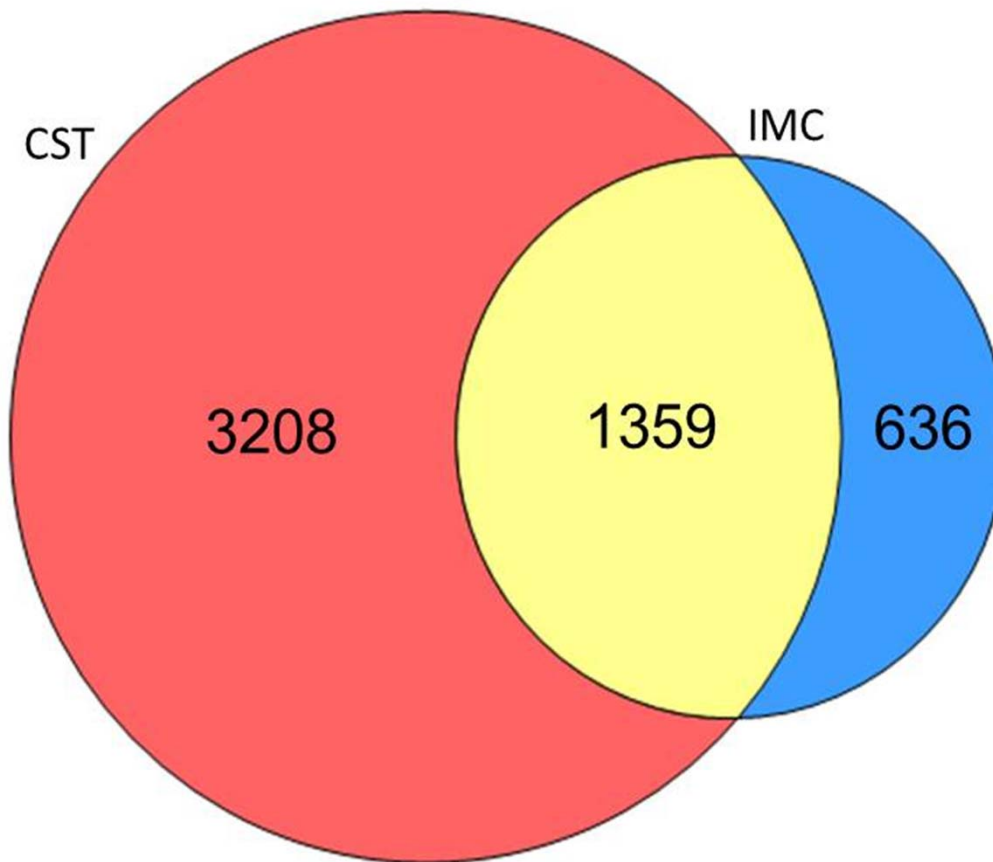

**Supplemental Figure 4:** (A) Number of distinct Kac and non-Kac peptides identified in with either the anti-Kac antibody from CST or IMC. Error bars represent the standard deviation for 3 replicates. (B) Overlap of distinct Kac peptides identified for three IP process replicates using the CST anti-Kac antibody. (C) Overlap of distinct Kac peptides identified for three IP process replicates using the IMC anti-Kac antibody. (D) Overlap of distinct Kac peptides identified across 3 IP process replicates using the anti-KAC antibody from CST and IMC.

A

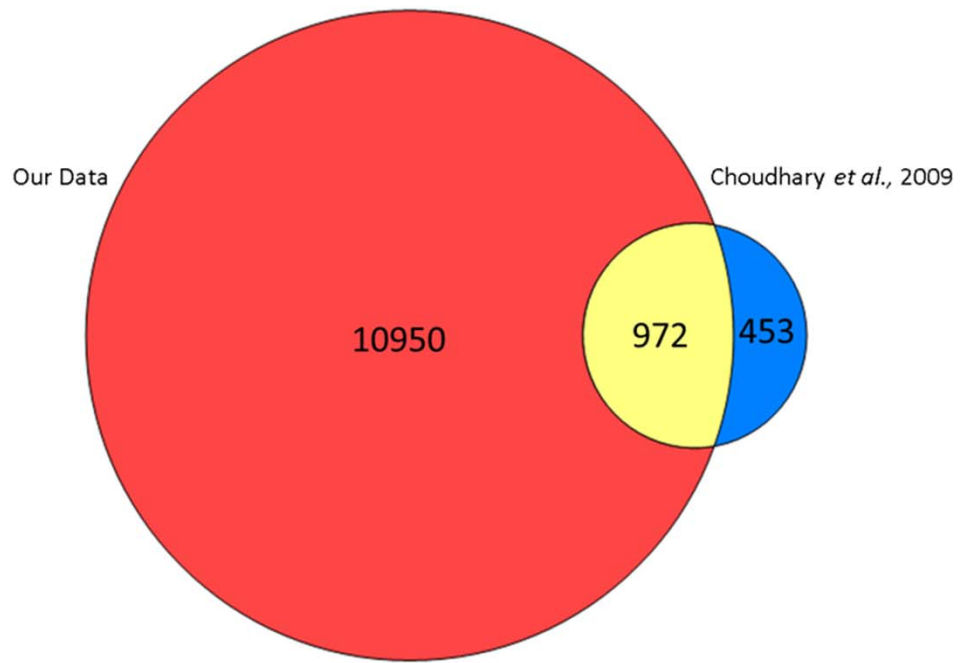

B

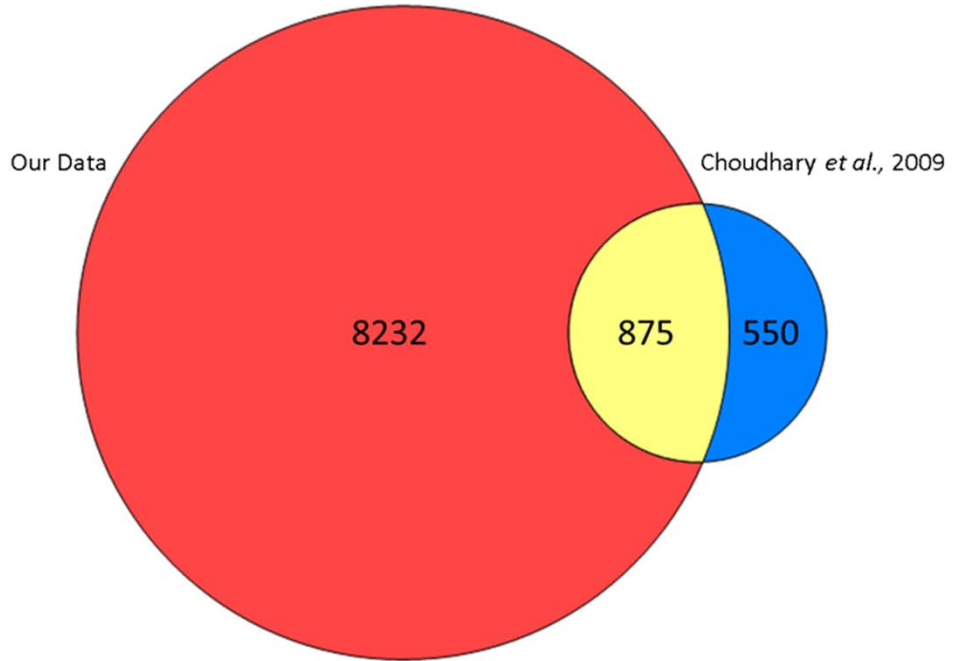

C

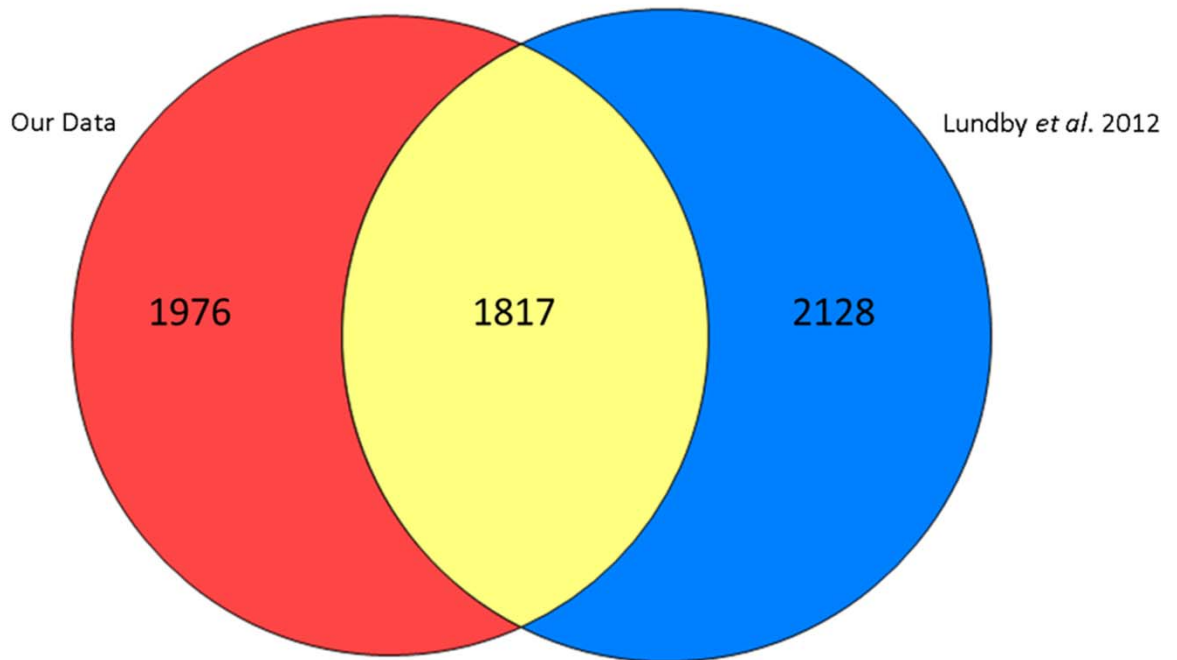

**Supplemental Figure 5:** (A) Overlap of sites identified in 3 replicates of our SILAC-labeled SAHA Jurkat dataset with the Choudhary *et al.* SAHA Jurkat dataset (10). (B) Overlap of sites identified in 1 replicate of our SILAC-labeled SAHA Jurkat dataset with the Choudhary *et al.* SAHA Jurkat dataset (10). (C) Overlap of Kac proteins identified in our dataset and the dataset of Lundby *et al.* (12) .

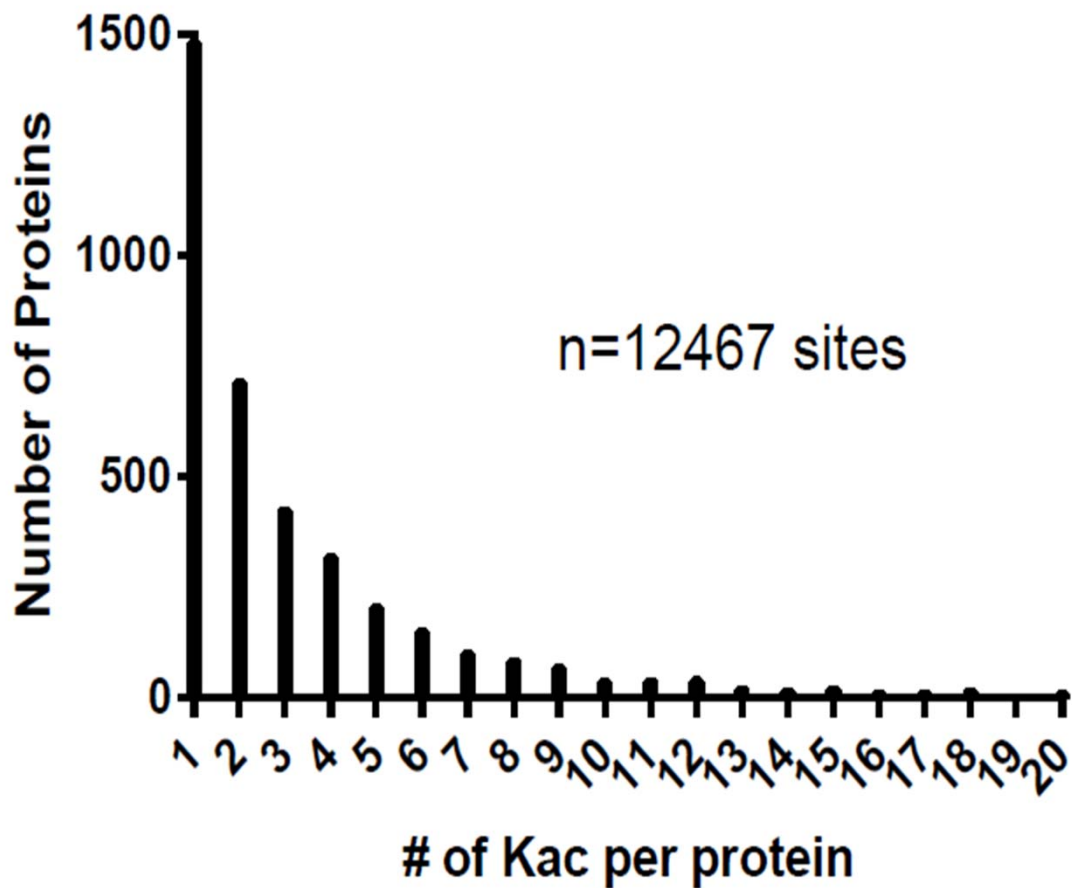

**Supplemental Figure 6:** Frequency plot of the number of acetylation sites identified per protein for 2uM SAHA cells vs. DMSO treated Jurkat cells.



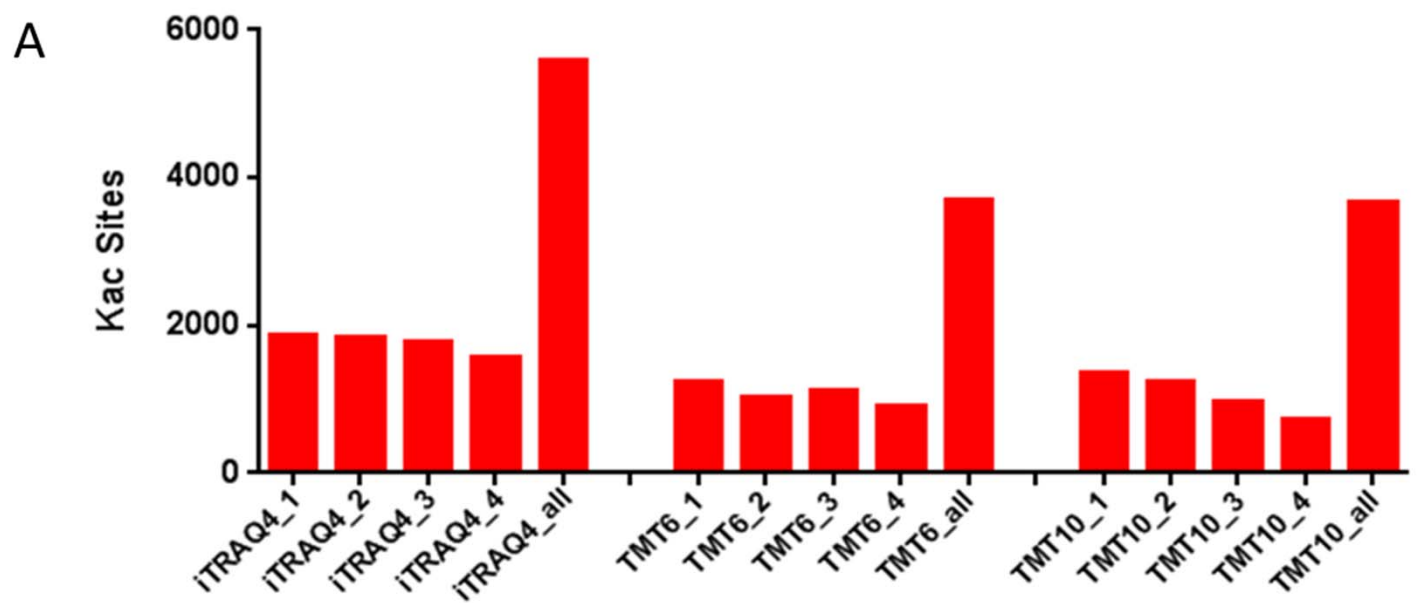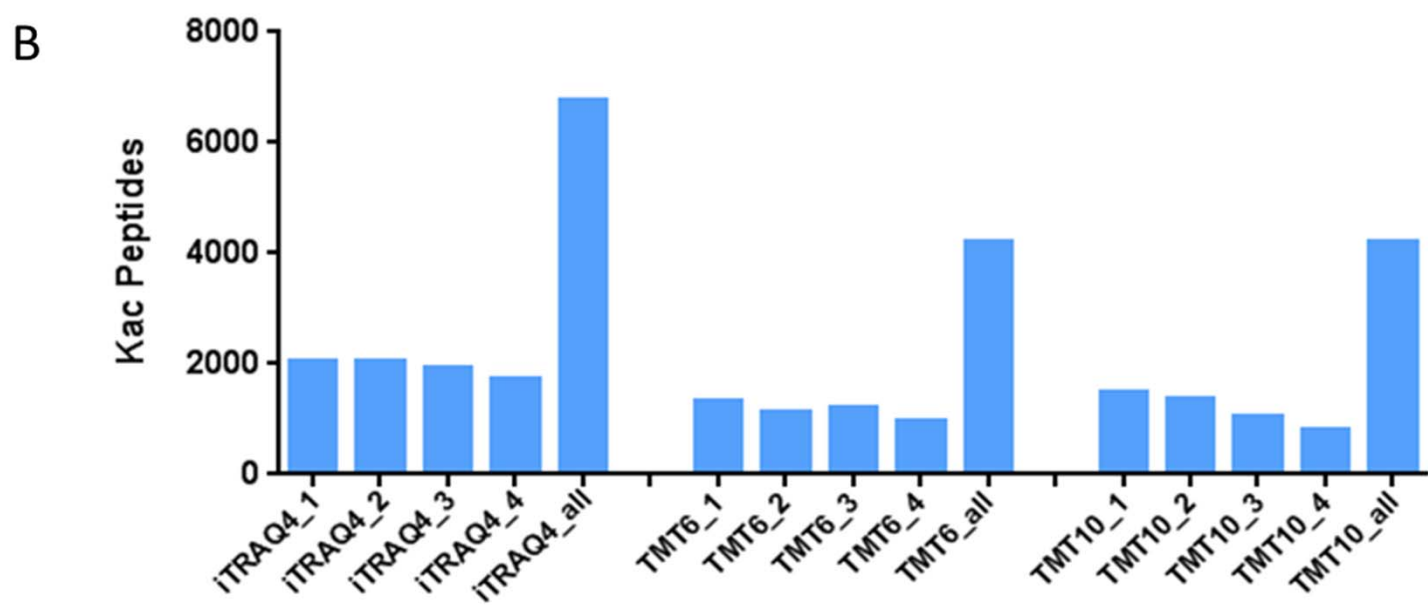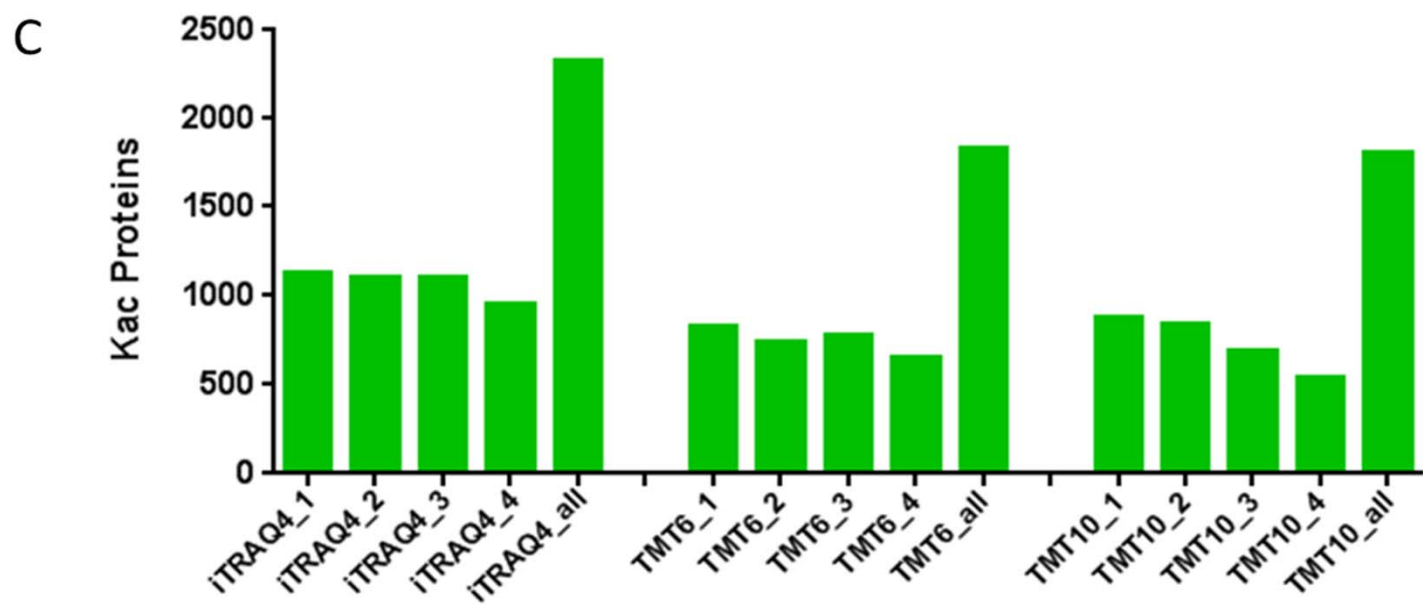

**Supplemental Figure 7:** Bar graphs illustrate the total number of distinct lysine-acetylated sites (A), peptides (B), and proteins (C) quantified in iTRAQ4-, TMT6-, and TMT10-labeled experiments from luminal and basal breast tumor mouse xenograft samples with 4 mg peptide input per plex. Numbers for individual fractions ("\_1" to "\_4") and the complete experiment ("\_all") are shown.

## **Supplemental Table 1:**

### **CST anti-Kac antibody development**

Tab 1: "ELISA analysis summary"- Absorbance values for ELISA analysis of seven clones in the CST anti-Kac lysine reagent.

Tab 2-Tab 8: "Unique Kac Peptides Clone 1-7"-Distinct Kac peptides identified for each of the seven clones comprising CST anti-Kac antibody.

Tab 9: "Unique Kac Peptides Combined Ab"-Distinct Kac peptides identified in the combined CST anti-Kac antibody.

## **Supplemental Table 2:**

### **Titration Curves Analysis and CST vs IMC comparison**

Tab 1: "Summary CST Ab Input Titration"- Summary of distinct Kac and Non-Kac peptides identified for variable amounts of CST anti-Kac antibody with 2 mg of Jurkat peptide input.

Tab 2: "CST Ab Titration Curve"-MaxQuant MS/MS "evidence" table of distinct peptides for all replicates of CST anti-Kac antibody titration curve data.

Tab 3: "Summary Protein Input Titration"- Summary of distinct Kac and Non-Kac peptides identified across all titration experiments where protein input amount was varied and CST anti-Kac antibody amount was kept constant.

Tab 4: "Protein Input Titration"-MaxQuant MS/MS "evidence" table of distinct peptides for all replicates of protein titration curve data.

Tab 5: "Summary IMC Titration"- Summary of distinct Kac and Non-Kac peptides identified for variable amounts of IMC anti-Kac antibody with 1 mg of Jurkat peptide input.

Tab 6: "IMC Titration Curve"- MaxQuant MS/MS "evidence" table of distinct peptides for all replicates of IMC anti-Kac antibody titration curve data.

Tab 7: "Summary CST Ab vs IMC Ab"-Summary of distinct Kac and non-Kac peptides identified in the comparison study between CST anti-Kac antibody and IMC anti-Kac antibody.

Tab 8: "CST Ab vs IMC Ab"- MaxQuant MS/MS "evidence" table of distinct peptides for all replicates of CST anti-Kac antibody and IMC anti-Kac antibody comparison study.

### **Supplemental Table 3:**

#### **SAHA Treated Jurkat Experiments**

Tab 1: "Summary\_Jurkat\_SAHA"-Table summarizes the number of distinct Kac and Non-Kac peptides found in bRP fractionated and non-fractionated SAHA treated Jurkat samples.

Tab 2: "All\_Jurkat\_SAHA\_KacPeptides"-MaxQuant MS/MS "Evidence" table for all replicates of bRP fractionated and non-fractionated SAHA treated Jurkat samples.

Tab 3: "bRPFxn\_Jurkat\_SAHA\_Kac\_Sites"-Kac site data for all replicates of bRP fractionated SAHA treated Jurkat samples.

Tab 4: "NonFxn\_Jurkat\_SAHA\_Kac\_Sites"-Kac site data for all replicated of non-fractionated SAHA treated Jurkat samples.

### **Supplemental Table 4:**

#### **iTRAQ and TMT data**

Tab 1: "Summary\_iTRAQ\_TMT"-Summary of Kac proteins and quantified and localized Kac peptides and sites identified in the iTRAQ and TMT experimental dataset.

Tab 2: "Kac\_iTRAQ"-Kac sites for the luminal and basal breast cancer samples labeled with iTRAQ4.

Tab 3: "Kac-TMT6"-Kac sites for the luminal and basal breast cancer samples labeled with TMT6.

Tab 4: "Kac\_TMT10"- Kac sites for the luminal and basal breast cancer samples labeled with TMT10.
